# Supplementary material for: Reviews and Syntheses: Composition and Characteristics ofBurrowing Animals along a Climate and Ecological Gradient,Chile
Source: Copernicus journal article supplement (doi:10.5194/bg-2021-75), 2021-05-06
Supplement: Supplementary file 1 [file bg-2021-75-supplement.pdf]

Supplement to:

## **Reviews and Synthesis: Composition and Characteristics of Burrowing Animals along a Climate and Ecological Gradient, Chile**

Übernicketl, Kirstin<sup>1</sup>, Pizarro-Araya, Jaime<sup>2</sup>, Bhagavathula, Susila<sup>1</sup>, Paulino, Leandro<sup>3</sup>, Ehlers, Todd A.<sup>1</sup>

<sup>1</sup> Department of Geosciences, University of Tübingen, 72076 Tübingen, Germany

<sup>2</sup> Laboratorio de Entomología Ecológica, Departamento de Biología, Facultad de Ciencias, Universidad de La Serena, La Serena, Chile

<sup>3</sup> Departamento de Suelos y Recursos Naturales, Facultad de Agronomía, Universidad de Concepción, Chillán, Chile

*Correspondence to:* Kirstin Übernicketl (kirstin@uebernicketl.net)

Content:

Table S1: Burrowing vertebrate species list from four Chilean study sites

Table S2: Burrowing invertebrate species list from four Chilean study sites

Table S3: Properties of study sites

Table S4: Parameters of sampled plots (geographic location, mobile layer depth, general description of surface)

Table S1: Burrowing vertebrate species list from four Chilean study sites. Abbreviations and symbology: PA= National Park Pan de Azúcar, SG = Private Reserve Santa Gracia, LC = National Park La Campana, NA= National Park Nahuelbuta; ■ = species present at site; □= species likely present at site; n.i.a. = no information available; *the full table of burrowing vertebrates in Chile with detailed information and reference list is the data publication Übernicketl et al. (2020)*

| Order      | Family         | Species                                                                                                                                               | Common name                                        | Elevation range [m a.s.l.]                                                     | PA | SG | LC | NA |
|------------|----------------|-------------------------------------------------------------------------------------------------------------------------------------------------------|----------------------------------------------------|--------------------------------------------------------------------------------|----|----|----|----|
| Aves       | Psittacidae    | <i>Cyanoliseus patagonus</i>                                                                                                                          | Burrowing Parrot, Trichahue                        | n.i.a.                                                                         | -  | ■  | -  | -  |
| Aves       | Strigidae      | <i>Athene cunicularia</i>                                                                                                                             | Burrowing Owl                                      | n.i.a.                                                                         | □  | □  | □  | -  |
| Reptilia   | Liolaemidae    | <i>Liolaemus torresi</i>                                                                                                                              | Dragon of Torres-Mura (Lizard)                     | n.i.a.                                                                         | □  | -  | -  | -  |
| Reptilia   | Teiidae        | <i>Callopistes maculatus</i> ; ( <i>Callopistes palluma</i> )<br><i>Lycalopex culpaeus</i>                                                            | Spotted False Monitor; Chilean Racerunner (Lizard) | 0-2,200                                                                        | ■  | ■  | ■  | -  |
| Camivora   | Canidae        | (= <i>Pseudalopex c.</i> ), (= <i>Dusicyon c.</i> )                                                                                                   | Culpeo (Fox)                                       | up to 4,500                                                                    | ■  | ■  | ■  | ■  |
| Camivora   | Canidae        | <i>Lycalopex griseus</i> (= <i>Dusicyon g.</i> )                                                                                                      | South American Gray Fox / Chilla                   | 0-100, rare at higher elevations                                               | ■  | ■  | ■  | ■  |
| Camivora   | Mephitidae     | <i>Conepatus chinga</i>                                                                                                                               | Molina's Hog-nosed Skunk                           | 0-3,000                                                                        | -  | □  | ■  | ■  |
| Cingulata  | Chlamyphoridae | <i>Zaedyus pichi</i>                                                                                                                                  | Pichi (Armadillo)                                  | 0-2,500                                                                        | -  | -  | □  | -  |
| Lagomorpha | Leporidae      | <i>Oryctolagus cuniculus</i>                                                                                                                          | European Rabbit                                    | usually <1,500                                                                 | -  | ■  | ■  | -  |
| Rodentia   | Abrocomidae    | <i>Abrocoma bennetti</i> (?)                                                                                                                          | Bennett's Chinchilla-Rat                           | 0-2,000                                                                        | ■  | ■  | ■  | -  |
| Rodentia   | Chinchillidae  | <i>Lagidium viscacia</i> (= <i>Lagidium peruanum</i> )                                                                                                | Southern (Mountain) Viscacha                       | 2,000-5,000                                                                    | ■  | -  | -  | -  |
| Rodentia   | Cricetidae     | <i>Abrothrix andinus</i> (= <i>Akodon andinus</i> )                                                                                                   | Andean Grass Mouse                                 | also found at 950 near Santiago; generally: 2,500-4,500                        | ■  | -  | -  | -  |
| Rodentia   | Cricetidae     | <i>Abrothrix longipilis</i> (= <i>Akodon longipilis</i> )<br><i>Abrothrix olivaceus</i> (= <i>Akodon olivaceus</i> , = <i>Abrothrix herskovitzi</i> ) | Long-haired Grass Mouse                            | 0-2,000                                                                        | ■  | ■  | ■  | ■  |
| Rodentia   | Cricetidae     | <i>Abrothrix olivaceus</i> , = <i>Abrothrix herskovitzi</i>                                                                                           | Olive Grass Mouse                                  | 0-2,500                                                                        | ■  | ■  | ■  | ■  |
| Rodentia   | Cricetidae     | <i>Chelemys macronyx</i>                                                                                                                              | Mountain mole rat / Andean Long-clawed mouse       | n.i.a.                                                                         | -  | -  | -  | ■  |
| Rodentia   | Cricetidae     | <i>Chelemys megalonyx</i>                                                                                                                             | Large Long-clawed Mouse / shrub mole rat           | 0-500                                                                          | -  | □  | ■  | ■  |
| Rodentia   | Cricetidae     | <i>Geoxus valdivianus</i>                                                                                                                             | Valdivian Long-clawed Mouse                        | 0-2,000                                                                        | -  | -  | -  | ■  |
| Rodentia   | Cricetidae     | <i>Phyllotis darwini</i> ( <i>Phyllotis limatus</i> )                                                                                                 | Darwin's Leaf-eared Mouse                          | 0-2,000                                                                        | ■  | ■  | ■  | □  |
| Rodentia   | Ctenomyidae    | <i>Ctenomys fulvus</i>                                                                                                                                | Tawny Tuco-tuco / Atacama tuco-tuco (rat)          | 1,000 - 3,700                                                                  | ■  | -  | -  | -  |
| Rodentia   | Muridae        | <i>Loxodontomys micropus</i> ( <i>Auliscomys micropus</i> )                                                                                           | Southern Pericote (mouse)                          | 0-2,500                                                                        | -  | -  | -  | □  |
| Rodentia   | Muridae        | <i>Mus musculus</i>                                                                                                                                   | Common House Mouse                                 | n.i.a.                                                                         | ■  | ■  | ■  | ■  |
| Rodentia   | Muridae        | <i>Rattus norvegicus</i>                                                                                                                              | Norway Rat / Brown rat / Black rat                 | n.i.a.                                                                         | -  | □  | □  | □  |
| Rodentia   | Myocastoridae  | <i>Myocastor coypus</i>                                                                                                                               | Coypu, Nutria (rat)                                | 0-1,190                                                                        | -  | ■  | ■  | ■  |
| Rodentia   | Octodontidae   | <i>Aconaemys fuscus</i>                                                                                                                               | Chilean Rock Rat                                   | high Andes 33° to 41° south, low elevations between Curicó and Ñuble provinces | -  | -  | -  | ■  |
| Rodentia   | Octodontidae   | <i>Aconaemys sagei</i>                                                                                                                                | Sage's Rock Rat                                    | lowland and precordillera                                                      | -  | -  | -  | □  |
| Rodentia   | Octodontidae   | <i>Octodon degus</i>                                                                                                                                  | Degu (rat)                                         | 0 - 1,800                                                                      | ■  | ■  | ■  | -  |
| Rodentia   | Octodontidae   | <i>Spalacopus cyanus</i>                                                                                                                              | Conuro (rat)                                       | 0 - 3,400 in the Andes                                                         | ■  | ■  | ■  | -  |

Table S2: Burrowing invertebrate species list from four Chilean study sites. Abbreviations and symbology: PA= National Park Pan de Azúcar, SG = Private Reserve Santa Gracia, LC = National Park La Campana, NA= National Park Nahuelbuta; ■ = species present at site; □= species likely present at site; n.i.a. = no information available; *the full table of burrowing vertebrates in Chile with detailed information and reference list is the data publication Übernickel et al. (2020)*

| Order          | Family        | Species                        | Common name<br>or general<br>classification | Elevation<br>range<br>[m a.s.l.] | PA<br>~26°<br>S | SG<br>~29°<br>S | LC<br>~33°<br>S | NA<br>~38°<br>S |
|----------------|---------------|--------------------------------|---------------------------------------------|----------------------------------|-----------------|-----------------|-----------------|-----------------|
| <b>SPIDERS</b> |               |                                |                                             |                                  |                 |                 |                 |                 |
| Araneae        | Actinopodidae | <i>Missulena tussulena</i>     | trap door spider                            | n.i.a.                           |                 |                 | □               |                 |
| Araneae        | Actinopodidae | <i>Plesiolenabonneti</i>       | trap door spider                            | n.i.a.                           |                 | ■               |                 |                 |
| Araneae        | Actinopodidae | <i>Plesiolenajorgelina</i>     | trap door spider                            | n.i.a.                           |                 | □               | □               |                 |
| Araneae        | Hexathelidae  | <i>Mediotheleanae</i>          | funnel-web spiders                          | n.i.a.                           |                 |                 | □               | □               |
| Araneae        | Hexathelidae  | <i>Mediotheleaustralis</i>     | funnel-web spiders                          | n.i.a.                           |                 |                 |                 | □               |
| Araneae        | Hexathelidae  | <i>Mediothelelinares</i>       | funnel-web spiders                          | n.i.a.                           |                 |                 | □               | □               |
| Araneae        | Hexathelidae  | <i>Mediotheleminima</i>        | funnel-web spiders                          | n.i.a.                           |                 |                 | □               |                 |
| Araneae        | Hexathelidae  | <i>Mediothele nahuelbuta</i>   | funnel-web spiders                          | n.i.a.                           |                 |                 |                 | ■               |
| Araneae        | Hexathelidae  | <i>Scotinoecusmajor</i>        | funnel-web spiders                          | n.i.a.                           |                 |                 | □               |                 |
| Araneae        | Hexathelidae  | <i>Scotinoecusrules</i>        | funnel-web spiders                          | n.i.a.                           |                 |                 | □               | □               |
| Araneae        | Migidae       | <i>Calathotarsus coronatus</i> | trap door spider                            | n.i.a.                           |                 |                 | ■               |                 |
| Araneae        | Migidae       | <i>Calathotarsuspihuychen</i>  | trap door spider                            | n.i.a.                           |                 |                 | ■               |                 |
| Araneae        | Migidae       | <i>Goloboffia biberi</i>       | trap door spider                            | n.i.a.                           |                 | □               | □               |                 |
| Araneae        | Migidae       | <i>Goloboffia griswoldi</i>    | trap door spider                            | n.i.a.                           |                 | □               | □               |                 |
| Araneae        | Migidae       | <i>Goloboffia megadeth</i>     | trap door spider                            | n.i.a.                           |                 | □               |                 |                 |
| Araneae        | Migidae       | <i>Goloboffia pachelbeli</i>   | trap door spider                            | n.i.a.                           |                 | □               |                 |                 |
| Araneae        | Nemesiidae    | <i>Chaco socos</i>             | trap door spider                            | n.i.a.                           |                 | □               |                 |                 |
| Araneae        | Nemesiidae    | <i>Chaco tigre</i>             | trap door spider                            | n.i.a.                           |                 |                 | □               |                 |
| Araneae        | Nemesiidae    | <i>Chilelopsiiscalderoni</i>   | trap door spider                            | n.i.a.                           | □               |                 |                 |                 |
| Araneae        | Nemesiidae    | <i>Chilelopsiispuertoviejo</i> | trap door spider                            | n.i.a.                           | □               |                 |                 |                 |
| Araneae        | Nemesiidae    | <i>Chilelopsiiserena</i>       | trap door spider                            | n.i.a.                           |                 | □               |                 |                 |
| Araneae        | Nemesiidae    | <i>Flamencopsis minima</i>     | trap door spider                            | n.i.a.                           | □               |                 |                 |                 |
| Araneae        | Nemesiidae    | <i>Lycinus caldera</i>         | trap door spider                            | n.i.a.                           | ■               | □               |                 |                 |
| Araneae        | Nemesiidae    | <i>Lycinus choros</i>          | trap door spider                            | n.i.a.                           |                 | ■               |                 |                 |
| Araneae        | Nemesiidae    | <i>Lycinus domeyko</i>         | trap door spider                            | n.i.a.                           | □               | ■               |                 |                 |
| Araneae        | Nemesiidae    | <i>Lycinus epipiptus</i>       | trap door spider                            | n.i.a.                           |                 | □               | ■               |                 |
| Araneae        | Nemesiidae    | <i>Lycinus frayjorge</i>       | trap door spider                            | n.i.a.                           |                 | □               |                 |                 |
| Araneae        | Nemesiidae    | <i>Lycinus gajardoi</i>        | trap door spider                            | n.i.a.                           |                 | ■               | □               |                 |
| Araneae        | Nemesiidae    | <i>Lycinus quilicura</i>       | trap door spider                            | n.i.a.                           |                 |                 | □               |                 |
| Araneae        | Nemesiidae    | <i>Lycinus tofo</i>            | trap door spider                            | n.i.a.                           | □               |                 |                 |                 |
| Araneae        | Oonopidae     | <i>Birabenella elqui</i>       | Goblin spider                               | n.i.a.                           |                 | ■               |                 |                 |
| Araneae        | Oonopidae     | <i>Birabenella homonota</i>    | Goblin spider                               | n.i.a.                           |                 | ■               |                 |                 |

table 2 - continued

| Order   | Family        | Species                            | Common name<br>or general<br>classification | Elevation<br>range<br>[m a.s.l.] | PA<br>~26°<br>S | SG<br>~29°<br>S | LC<br>~33°<br>S | NA<br>~38°<br>S |
|---------|---------------|------------------------------------|---------------------------------------------|----------------------------------|-----------------|-----------------|-----------------|-----------------|
| Araneae | Oonopidae     | <i>Birabenella kamanchaca</i>      | Goblin spider                               | n.i.a.                           | ■               |                 |                 |                 |
| Araneae | Oonopidae     | <i>Birabenella pizarroi</i>        | Goblin spider                               | n.i.a.                           |                 | □               |                 |                 |
| Araneae | Pycnothelidae | <i>Acanthogonatus alegre</i>       | trap door spider                            | n.i.a.                           | □               |                 |                 |                 |
| Araneae | Pycnothelidae | <i>Acanthogonatus brunneus</i>     | trap door spider                            | n.i.a.                           |                 |                 |                 | □               |
| Araneae | Pycnothelidae | <i>Acanthogonatus campanae</i>     | trap door spider                            | n.i.a.                           |                 |                 | ■               |                 |
| Araneae | Pycnothelidae | <i>Acanthogonatus chilechico</i>   | trap door spider                            | n.i.a.                           |                 |                 |                 | □               |
| Araneae | Pycnothelidae | <i>Acanthogonatus confusus</i>     | trap door spider                            | n.i.a.                           |                 |                 |                 | □               |
| Araneae | Pycnothelidae | <i>Acanthogonatus francki</i>      | trap door spider                            | n.i.a.                           |                 |                 | ■               |                 |
| Araneae | Pycnothelidae | <i>Acanthogonatus hualpen</i>      | trap door spider                            | n.i.a.                           |                 |                 |                 | □               |
| Araneae | Pycnothelidae | <i>Acanthogonatus huaquen</i>      | trap door spider                            | n.i.a.                           |                 |                 | ■               | □               |
| Araneae | Pycnothelidae | <i>Acanthogonatus juncal</i>       | trap door spider                            | n.i.a.                           |                 |                 | □               |                 |
| Araneae | Pycnothelidae | <i>Acanthogonatus mulchen</i>      | trap door spider                            | n.i.a.                           |                 |                 |                 | □               |
| Araneae | Pycnothelidae | <i>Acanthogonatus nahuelbuta</i>   | trap door spider                            | n.i.a.                           |                 |                 |                 | ■               |
| Araneae | Pycnothelidae | <i>Acanthogonatus patagallina</i>  | trap door spider                            | n.i.a.                           |                 |                 |                 | □               |
| Araneae | Pycnothelidae | <i>Acanthogonatus peniasco</i>     | trap door spider                            | n.i.a.                           |                 |                 |                 | □               |
| Araneae | Pycnothelidae | <i>Acanthogonatus pissii</i>       | trap door spider                            | n.i.a.                           |                 | □               | □               | □               |
| Araneae | Pycnothelidae | <i>Acanthogonatus quilocura</i>    | trap door spider                            | n.i.a.                           |                 |                 | ■               |                 |
| Araneae | Pycnothelidae | <i>Acanthogonatus recinto</i>      | trap door spider                            | n.i.a.                           |                 |                 |                 | ■               |
| Araneae | Pycnothelidae | <i>Acanthogonatus subalpeianus</i> | trap door spider                            | n.i.a.                           |                 |                 |                 | □               |
| Araneae | Pycnothelidae | <i>Acanthogonatus tolhuaca</i>     | trap door spider                            | n.i.a.                           |                 |                 |                 | □               |
| Araneae | Pycnothelidae | <i>Acanthogonatus vilches</i>      | trap door spider                            | n.i.a.                           |                 |                 | □               |                 |
| Araneae | Sicariidae    | <i>Sicarius crustosus</i>          | sand recluse<br>spider                      | n.i.a.                           | ■               | □               |                 |                 |
| Araneae | Sicariidae    | <i>Sicarius fumosus</i>            | sand recluse<br>spider                      | n.i.a.                           |                 |                 | □               |                 |
| Araneae | Sicariidae    | <i>Sicarius lanuginosus</i>        | sand recluse<br>spider                      | n.i.a.                           |                 | □               |                 |                 |
| Araneae | Sicariidae    | <i>Sicarius thomisoides</i>        | sand recluse<br>spider                      | n.i.a.                           | ■               | ■               | □               |                 |
| Araneae | Theraphosidae | <i>Euathlus condorito</i>          | Tarantula                                   | n.i.a.                           |                 |                 | □               |                 |

table 2 - continued

| Order            | Family        | Species                         | Common name<br>or general<br>classification | Elevation<br>range<br>[m a.s.l.] | PA<br>~26°<br>S | SG<br>~29°<br>S | LC<br>~33°<br>S | NA<br>~38°<br>S |
|------------------|---------------|---------------------------------|---------------------------------------------|----------------------------------|-----------------|-----------------|-----------------|-----------------|
| Araneae          | Theraphosidae | <i>Euathlus manicata</i>        | Tarantula                                   | n.i.a.                           |                 |                 |                 | □               |
| Araneae          | Theraphosidae | <i>Euathlus parvulus</i>        | Tarantula                                   | n.i.a.                           |                 |                 | □               |                 |
| Araneae          | Theraphosidae | <i>Euathlus truculentus</i>     | Tarantula                                   | n.i.a.                           |                 |                 | □               |                 |
| Araneae          | Theraphosidae | <i>Grammostola rosea</i>        | Tarantula                                   | 500-2,000                        |                 | □               | □               |                 |
| Araneae          | Theraphosidae | <i>Homoeomma chilensis</i>      | Tarantula                                   | n.i.a.                           |                 |                 | □               | □               |
| Araneae          | Theraphosidae | <i>Homoeomma orellanai</i>      | Tarantula                                   | n.i.a.                           |                 |                 | □               | □               |
| Araneae          | Theraphosidae | <i>Phrixotrichus jara</i>       | Tarantula                                   | n.i.a.                           |                 |                 |                 | □               |
| Araneae          | Theraphosidae | <i>Phrixotrichus scrofa</i>     | Tarantula                                   | n.i.a.                           |                 |                 |                 | □               |
| Araneae          | Theraphosidae | <i>Phrixotrichus vulpinus</i>   | Tarantula                                   | n.i.a.                           |                 |                 |                 | □               |
| Araneae          | Zodariidae    | <i>Cybaeodamus lycosoide</i>    | Ant spider                                  | n.i.a.                           |                 | □               |                 |                 |
| Araneae          | Zodariidae    | <i>Cyrioceta calderoni</i>      | Ant spider                                  | n.i.a.                           |                 |                 | □               |                 |
| Araneae          | Zodariidae    | <i>Cyrioceta cruz</i>           | Ant spider                                  | n.i.a.                           |                 | □               |                 |                 |
| Araneae          | Zodariidae    | <i>Cyrioceta mauryi</i>         | Ant spider                                  | n.i.a.                           |                 | □               |                 |                 |
| Araneae          | Zodariidae    | <i>Cyrioceta spinifera</i>      | Ant spider                                  | n.i.a.                           |                 | □               |                 |                 |
| Araneae          | Zodariidae    | <i>Platnickia elegans</i>       | Ant spider                                  | n.i.a.                           |                 |                 |                 | □               |
| Araneae          | Zodariidae    | <i>Platnickia wedalen</i>       | Ant spider                                  | n.i.a.                           |                 | □               | □               | □               |
| <b>SOLIFUGES</b> |               |                                 |                                             |                                  |                 |                 |                 |                 |
| Solifugae        | Ammotrechidae | <i>Ammotrecha araucana</i>      | camel spider, sun spider                    | n.i.a.                           |                 |                 | □               |                 |
| Solifugae        | Ammotrechidae | <i>Chileotrecha atacamensis</i> | camel spider, sun spider                    | n.i.a.                           | □               |                 |                 |                 |
| Solifugae        | Ammotrechidae | <i>Chileotrecha romero</i>      | camel spider, sun spider                    | n.i.a.                           |                 | □               |                 |                 |
| Solifugae        | Ammotrechidae | <i>Pseudocleobis chilensis</i>  | camel spider, sun spider                    | n.i.a.                           |                 |                 | □               |                 |
| Solifugae        | Daesiidae     | <i>Ammotrechelis goetschi</i>   | camel spider, sun spider                    | n.i.a.                           | □               | □               |                 |                 |
| Solifugae        | Mummuciidae   | <i>Mummucia variegata</i>       | camel spider, sun spider                    | n.i.a.                           |                 | □               |                 |                 |
| Solifugae        | Mummuciidae   | <i>Mummucina colinalis</i>      | camel spider, sun spider                    | n.i.a.                           |                 |                 | □               |                 |
| Solifugae        | Mummuciidae   | <i>Sedna pirata</i>             | camel spider, sun spider                    | n.i.a.                           |                 |                 | □               |                 |
| Solifugae        | Mummuciidae   | <i>Uspallata pulchra</i>        | camel spider, sun spider                    | n.i.a.                           |                 |                 | □               |                 |
| <b>SCORPIONS</b> |               |                                 |                                             |                                  |                 |                 |                 |                 |
| Scorpiones       | Bothriuridae  | <i>Bothriurus coriaceus</i>     | Scorpion                                    | 0-1,000                          |                 | ■               | □               |                 |
| Scorpiones       | Bothriuridae  | <i>Bothriurus dumayi</i>        | Scorpion                                    | 0-300                            | □               | ■               |                 |                 |
| Scorpiones       | Bothriuridae  | <i>Bothriurus huincul</i>       | Scorpion                                    | 0-2,000                          |                 |                 |                 | □               |

table 2 - continued

| Order          | Family        | Species                             | Common name<br>or general<br>classification | Elevation<br>range<br>[m a.s.l.] | PA<br>~26°<br>S | SG<br>~29°<br>S | LC<br>~33°<br>S | NA<br>~38°<br>S |
|----------------|---------------|-------------------------------------|---------------------------------------------|----------------------------------|-----------------|-----------------|-----------------|-----------------|
| Scorpiones     | Bothriuridae  | <i>Bothriurus keyserlingi</i>       | Scorpion                                    | 0-1,000                          |                 |                 | □               |                 |
| Scorpiones     | Bothriuridae  | <i>Brachistosternus barigai</i>     | Scorpion                                    | 0-250                            | □               |                 |                 |                 |
| Scorpiones     | Bothriuridae  | <i>Brachistosternus kamanchaca</i>  | Scorpion                                    | 0-500                            | ■               |                 |                 |                 |
| Scorpiones     | Bothriuridae  | <i>Brachistosternus negrei</i>      | Scorpion                                    | 0-1,500                          |                 |                 |                 | □               |
| Scorpiones     | Bothriuridae  | <i>Brachistosternus ochoai</i>      | Scorpion                                    | 0-1,000                          | ■               |                 |                 |                 |
| Scorpiones     | Bothriuridae  | <i>Brachistosternus paposo</i>      | Scorpion                                    | 0-1,000                          | ■               |                 |                 |                 |
| Scorpiones     | Bothriuridae  | <i>Brachistosternus roigalsinai</i> | Scorpion                                    | 0-1,000                          |                 | ■               |                 |                 |
| Scorpiones     | Bothriuridae  | <i>Brachistosternus sciosciae</i>   | Scorpion                                    | 0-50                             | □               |                 |                 |                 |
| Scorpiones     | Bothriuridae  | <i>Centromachetes obscurus</i>      | Scorpion                                    | n.i.a.                           |                 |                 |                 | □               |
| Scorpiones     | Bothriuridae  | <i>Centromachetes pococki</i>       | Scorpion                                    | 0-500                            |                 |                 | □               | □               |
| Scorpiones     | Bothriuridae  | <i>Centromachetes titschaki</i>     | Scorpion                                    | 0-500                            |                 |                 |                 | □               |
| Scorpiones     | Bothriuridae  | <i>Phoniocercus pictus</i>          | Scorpion                                    | 0-500                            |                 |                 |                 | □               |
| Scorpiones     | Bothriuridae  | <i>Phoniocercus sanmartini</i>      | Scorpion                                    | 0-500                            |                 |                 |                 | □               |
| Scorpiones     | Bothriuridae  | <i>Rumikiru atacama</i>             | Scorpion                                    | 0-500                            | ■               |                 |                 |                 |
| Scorpiones     | Bothriuridae  | <i>Rumikiru lourencoi</i>           | Scorpion                                    | 0-500                            | ■               |                 |                 |                 |
| Scorpiones     | Bothriuridae  | <i>Tehuanka moyanoi</i>             | Scorpion                                    | 0-500                            |                 |                 |                 | □               |
| Scorpiones     | Bothriuridae  | <i>Urophonius mondacai</i>          | Scorpion                                    | 0-750                            |                 |                 | □               |                 |
| Scorpiones     | Bothriuridae  | <i>Urophonius pizaroi</i>           | Scorpion                                    | 0-500                            |                 |                 | □               |                 |
| Scorpiones     | Bothriuridae  | <i>Urophonius transandinus</i>      | Scorpion                                    | 0-1,000                          |                 |                 | □               |                 |
| Scorpiones     | Bothriuridae  | <i>Urophonius tregualemuensis</i>   | Scorpion                                    | 0-500                            |                 |                 |                 | □               |
| Scorpiones     | Bothriuridae  | <i>Urophonius tumbensis</i>         | Scorpion                                    | 0-200                            |                 |                 |                 | □               |
| <b>BEEPLES</b> |               |                                     |                                             |                                  |                 |                 |                 |                 |
| Coleoptera     | Tenebrionidae | <i>Gyriosomus amabilis</i>          | Darkling beetle                             | n.i.a.                           |                 | □               |                 |                 |
| Coleoptera     | Tenebrionidae | <i>Gyriosomus batesi</i>            | Darkling beetle                             | n.i.a.                           | □               |                 |                 |                 |
| Coleoptera     | Tenebrionidae | <i>Gyriosomus camanchaca</i>        | Darkling beetle                             | n.i.a.                           | □               |                 |                 |                 |
| Coleoptera     | Tenebrionidae | <i>Gyriosomus chango</i>            | Darkling beetle                             | n.i.a.                           | ■               |                 |                 |                 |
| Coleoptera     | Tenebrionidae | <i>Gyriosomus curtisi</i>           | Darkling beetle                             | n.i.a.                           | □               |                 |                 |                 |
| Coleoptera     | Tenebrionidae | <i>Gyriosomus hoppei</i>            | Darkling beetle                             | n.i.a.                           |                 | ■               |                 |                 |

table 2 - continued

| Order      | Family        | Species                                                           | Common name<br>or general<br>classification | Elevation<br>range<br>[m a.s.l.] | PA<br>~26°<br>S | SG<br>~29°<br>S | LC<br>~33°<br>S | NA<br>~38°<br>S |
|------------|---------------|-------------------------------------------------------------------|---------------------------------------------|----------------------------------|-----------------|-----------------|-----------------|-----------------|
| Coleoptera | Tenebrionidae | <i>Gyriosomus laevigatus</i>                                      | Darkling beetle                             | n.i.a.                           |                 |                 | ■               |                 |
| Coleoptera | Tenebrionidae | <i>Gyriosomus luczotii</i>                                        | Darkling beetle                             | n.i.a.                           |                 | ■               |                 |                 |
| Coleoptera | Tenebrionidae | <i>Gyriosomus marmoratus</i>                                      | Darkling beetle                             | n.i.a.                           |                 | ■               |                 |                 |
| Coleoptera | Tenebrionidae | <i>Gyriosomus multigranulosus</i>                                 | Darkling beetle                             | n.i.a.                           |                 | □               |                 |                 |
| Coleoptera | Tenebrionidae | <i>Praocis</i><br>( <i>Mesopraocis</i> )<br><i>arenicola</i>      | Darkling beetle                             | 0-300                            | ■               |                 |                 |                 |
| Coleoptera | Tenebrionidae | <i>Praocis</i><br>( <i>Mesopraocis</i> )<br><i>calderana</i>      | Darkling beetle                             | 0-500                            | □               |                 |                 |                 |
| Coleoptera | Tenebrionidae | <i>Praocis</i><br>( <i>Mesopraocis</i> )<br><i>nitens</i>         | Darkling beetle                             | 0-300                            | □               |                 |                 |                 |
| Coleoptera | Tenebrionidae | <i>Praocis</i><br>( <i>Mesopraocis</i> )<br><i>pilula</i>         | Darkling beetle                             | 0-300                            | □               |                 |                 |                 |
| Coleoptera | Tenebrionidae | <i>Praocis (Praocis)</i><br><i>aenea</i>                          | Darkling beetle                             | n.i.a.                           |                 | □               |                 |                 |
| Coleoptera | Tenebrionidae | <i>Praocis (Praocis)</i><br><i>marginata</i>                      | Darkling beetle                             | n.i.a.                           | □               |                 |                 |                 |
| Coleoptera | Tenebrionidae | <i>Praocis (Praocis)</i><br><i>parva</i>                          | Darkling beetle                             | n.i.a.                           |                 | ■               |                 |                 |
| Coleoptera | Tenebrionidae | <i>Praocis (Praocis)</i><br><i>spinolai</i>                       | Darkling beetle                             | n.i.a.                           | ■               | ■               |                 |                 |
| Coleoptera | Tenebrionidae | <i>Praocis (Praocis)</i><br><i>subaenea</i>                       | Darkling beetle                             | n.i.a.                           |                 | ■               | ■               |                 |
| Coleoptera | Tenebrionidae | <i>Praocis (Praocis)</i><br><i>sulcata</i>                        | Darkling beetle                             | n.i.a.                           | □               | □               | □               |                 |
| Coleoptera | Tenebrionidae | <i>Phaleria beechei</i>                                           | Darkling beetle                             | n.i.a.                           | ■               |                 |                 |                 |
| Coleoptera | Tenebrionidae | <i>Phaleria gayi</i>                                              | Darkling beetle                             | n.i.a.                           | ■               |                 |                 |                 |
| Coleoptera | Tenebrionidae | <i>Phaleria maculata</i>                                          | Darkling beetle                             | n.i.a.                           | □               | □               | □               |                 |
| Coleoptera | Carabidae     | <i>Calosoma rufipennis</i>                                        | ground beetle                               | n.i.a.                           | ■               |                 |                 |                 |
| Coleoptera | Carabidae     | <i>Calosoma vagans</i>                                            | ground beetle                               | n.i.a.                           | ■               | ■               | ■               | ■               |
| Coleoptera | Carabidae     | <i>Ceroglossus chilensis</i>                                      | ground beetle                               | 0 - 2300                         |                 |                 |                 | ■               |
| Coleoptera | Carabidae     | <i>Trechisibus angularis</i>                                      | ground beetle                               | 0 - 2300                         |                 |                 |                 | ■               |
| Coleoptera | Cicindelidae  | <i>Cicindela</i><br>( <i>Plectographa</i> )<br><i>nahuelbutae</i> | Ground beetle                               | n.i.a.                           |                 |                 |                 | ■               |
| Coleoptera | Trogidae      | <i>Polynoncus brevicollis</i>                                     | Trogids                                     | n.i.a.                           |                 | ■               | ■               | □               |
| Coleoptera | Trogidae      | <i>Polynoncus bullatus</i>                                        | Trogids                                     | n.i.a.                           | ■               | ■               | ■               | ■               |
| Coleoptera | Trogidae      | <i>Polynoncus chilensis</i>                                       | Trogids                                     | n.i.a.                           |                 |                 |                 | ■               |
| Coleoptera | Trogidae      | <i>Polynoncus crypticus</i>                                       | Trogids                                     | n.i.a.                           |                 |                 |                 | ■               |

table 2 - continued

| Order      | Family       | Species                               | Common name<br>or general<br>classification | Elevation<br>range<br>[m a.s.l.] | PA<br>~26°<br>S | SG<br>~29°<br>S | LC<br>~33°<br>S | NA<br>~38°<br>S |
|------------|--------------|---------------------------------------|---------------------------------------------|----------------------------------|-----------------|-----------------|-----------------|-----------------|
| Coleoptera | Trogidae     | <i>Polynoncus<br/>diffluens</i>       | Trogids                                     | n.i.a.                           |                 |                 | □               | ■               |
| Coleoptera | Trogidae     | <i>Polynoncus<br/>gibberosus</i>      | Trogids                                     | n.i.a.                           |                 |                 |                 | □               |
| Coleoptera | Trogidae     | <i>Polynoncus<br/>longitarsis</i>     | Trogids                                     | n.i.a.                           |                 |                 |                 | ■               |
| Coleoptera | Trogidae     | <i>Polynoncus<br/>mirabilis</i>       | Trogids                                     | n.i.a.                           |                 |                 |                 | ■               |
| Coleoptera | Geotrupidae  | <i>Bolborhinum<br/>laesicolle</i>     | Dung beetle                                 | n.i.a.                           |                 |                 |                 | ■               |
| Coleoptera | Geotrupidae  | <i>Bolborhinum<br/>nasutum</i>        | Dung beetle                                 | n.i.a.                           |                 |                 | □               |                 |
| Coleoptera | Geotrupidae  | <i>Bolborhinum<br/>shajovskoyi</i>    | Dung beetle                                 | n.i.a.                           |                 |                 |                 | □               |
| Coleoptera | Geotrupidae  | <i>Bolborhinum<br/>trilobulicome</i>  | Dung beetle                                 | n.i.a.                           |                 |                 |                 | □               |
| Coleoptera | Geotrupidae  | <i>Bolborhinum<br/>tubericeps</i>     | Dung beetle                                 | n.i.a.                           |                 |                 |                 | □               |
| Coleoptera | Geotrupidae  | <i>Frickius<br/>variolosus</i>        | Dung beetle                                 | n.i.a.                           |                 |                 |                 | □               |
| Coleoptera | Geotrupidae  | <i>Taurocerastes<br/>patagonicus</i>  | Dung beetle                                 | n.i.a.                           |                 |                 |                 | □               |
| Coleoptera | Scarabaeidae | <i>Acanthaphodius<br/>bruchii</i>     | Scarab beetle                               | n.i.a.                           |                 |                 | □               | □               |
| Coleoptera | Scarabaeidae | <i>Arctodium<br/>vulpinum</i>         | Scarab beetle                               | n.i.a.                           |                 | □               |                 |                 |
| Coleoptera | Scarabaeidae | <i>Ataenius<br/>chilensis</i>         | Dung beetle                                 | n.i.a.                           |                 | □               | □               | □               |
| Coleoptera | Scarabaeidae | <i>Ataenius<br/>gracilis</i>          | Dung beetle                                 | n.i.a.                           |                 |                 | □               | □               |
| Coleoptera | Scarabaeidae | <i>Ataenius<br/>opatroides</i>        | Dung beetle                                 | n.i.a.                           |                 |                 | □               | □               |
| Coleoptera | Scarabaeidae | <i>Ataenius<br/>picinus</i>           | Dung beetle                                 | n.i.a.                           |                 |                 |                 | □               |
| Coleoptera | Scarabaeidae | <i>Ataenius<br/>platensis</i>         | Dung beetle                                 | n.i.a.                           |                 | □               |                 |                 |
| Coleoptera | Scarabaeidae | <i>Ataenius<br/>strigicaudus</i>      | Dung beetle                                 | n.i.a.                           |                 |                 | □               | □               |
| Coleoptera | Scarabaeidae | <i>Aulacopalpus<br/>aconcaguensis</i> | Scarab beetle                               | n.i.a.                           |                 | □               |                 |                 |
| Coleoptera | Scarabaeidae | <i>Aulacopalpus<br/>castaneus</i>     | Scarab beetle                               | n.i.a.                           |                 | □               |                 |                 |
| Coleoptera | Scarabaeidae | <i>Aulacopalpus<br/>ciliatus</i>      | Scarab beetle                               | n.i.a.                           |                 | □               |                 |                 |
| Coleoptera | Scarabaeidae | <i>Australaphodius<br/>frenchi</i>    | Scarab beetle                               | n.i.a.                           |                 | □               | □               | □               |
| Coleoptera | Scarabaeidae | <i>Calamostemus<br/>granarius</i>     | Scarab beetle                               | n.i.a.                           |                 | □               | □               | □               |
| Coleoptera | Scarabaeidae | <i>Desertaclopus<br/>atacamensis</i>  | Scarab beetle                               | n.i.a.                           | □               |                 |                 |                 |
| Coleoptera | Scarabaeidae | <i>Homocopris<br/>punctatissimus</i>  | Dung beetle                                 | n.i.a.                           |                 |                 |                 | □               |
| Coleoptera | Scarabaeidae | <i>Homocopris<br/>torulosus</i>       | Dung beetle                                 | n.i.a.                           |                 |                 |                 | □               |
| Coleoptera | Scarabaeidae | <i>Hylamorpha<br/>elegans</i>         | Scarab beetle                               | n.i.a.                           |                 | □               |                 |                 |

table 2 - continued

| Order      | Family       | Species                                         | Common name<br>or general<br>classification | Elevation<br>range<br>[m a.s.l.] | PA<br>~26°<br>S | SG<br>~29°<br>S | LC<br>~33°<br>S | NA<br>~38°<br>S |
|------------|--------------|-------------------------------------------------|---------------------------------------------|----------------------------------|-----------------|-----------------|-----------------|-----------------|
| Coleoptera | Scarabaeidae | <i>Labarus pseudolividus</i>                    | Scarab beetle                               | n.i.a.                           |                 | □               |                 |                 |
| Coleoptera | Scarabaeidae | <i>Leiopsammodius indefensus</i>                | Dung beetle                                 | n.i.a.                           |                 |                 | □               | □               |
| Coleoptera | Scarabaeidae | <i>Lichnia gallardoii</i>                       | Scarab beetle                               | n.i.a.                           |                 | □               |                 |                 |
| Coleoptera | Scarabaeidae | <i>Lichnia limbata</i>                          | Scarab beetle                               | n.i.a.                           |                 | □               |                 |                 |
| Coleoptera | Scarabaeidae | <i>Liogenys grandis</i>                         | Scarab beetle                               | n.i.a.                           |                 | □               |                 |                 |
| Coleoptera | Scarabaeidae | <i>Liogenys hirtus</i>                          | Scarab beetle                               | n.i.a.                           |                 | □               |                 |                 |
| Coleoptera | Scarabaeidae | <i>Liogenys palpalis</i>                        | Scarab beetle                               | n.i.a.                           |                 | □               |                 |                 |
| Coleoptera | Scarabaeidae | <i>Liogenys penai</i>                           | Scarab beetle                               | n.i.a.                           | □               |                 |                 |                 |
| Coleoptera | Scarabaeidae | <i>Liogenys wagenknechti</i>                    | Scarab beetle                               | n.i.a.                           | □               |                 |                 |                 |
| Coleoptera | Scarabaeidae | <i>Luispenaia atacamensis</i>                   | Scarab beetle                               | n.i.a.                           | □               | □               |                 |                 |
| Coleoptera | Scarabaeidae | <i>Luispenaia paposo</i>                        | Scarab beetle                               | n.i.a.                           | □               |                 |                 |                 |
| Coleoptera | Scarabaeidae | <i>Luispenaia paradoxa</i>                      | Scarab beetle                               | n.i.a.                           | □               | □               |                 |                 |
| Coleoptera | Scarabaeidae | <i>Luispenaia paulseni</i>                      | Scarab beetle                               | n.i.a.                           | □               | □               |                 |                 |
| Coleoptera | Scarabaeidae | <i>Macroductylus chilensis</i>                  | Scarab beetle                               | n.i.a.                           |                 | □               |                 |                 |
| Coleoptera | Scarabaeidae | <i>Megathopa villosa</i>                        | Dung beetle                                 | n.i.a.                           |                 | □               |                 |                 |
| Coleoptera | Scarabaeidae | <i>Oogenius penai</i>                           | Scarab beetle                               | 1,200-<br>1,600                  |                 |                 | ■               |                 |
| Coleoptera | Scarabaeidae | <i>Oogenius virens</i>                          | Scarab beetle                               | n.i.a.                           |                 | □               |                 |                 |
| Coleoptera | Scarabaeidae | <i>Orodaliscoides rugosiceps</i>                | Scarab beetle                               | n.i.a.                           |                 |                 | □               | □               |
| Coleoptera | Scarabaeidae | <i>Oryctomorphus bimaculatus</i>                | Scarab beetle                               | n.i.a.                           |                 |                 | ■               | ■               |
| Coleoptera | Scarabaeidae | <i>Oryctomorphus maculicollis</i>               | Scarab beetle                               | n.i.a.                           |                 | □               |                 |                 |
| Coleoptera | Scarabaeidae | <i>Pacuvia castanea</i>                         | Scarab beetle                               | n.i.a.                           | □               |                 |                 |                 |
| Coleoptera | Scarabaeidae | <i>Pacuvia philippiana</i>                      | Scarab beetle                               | n.i.a.                           | □               |                 |                 |                 |
| Coleoptera | Scarabaeidae | <i>Parataenius simulator</i>                    | Dung beetle                                 | n.i.a.                           |                 |                 | □               | □               |
| Coleoptera | Scarabaeidae | <i>Platytomus micros</i>                        | Scarab beetle                               | n.i.a.                           |                 |                 | □               |                 |
| Coleoptera | Scarabaeidae | <i>Plectris talinay</i>                         | Scarab beetle                               | n.i.a.                           |                 | □               |                 |                 |
| Coleoptera | Scarabaeidae | <i>Pleurophorus caesus</i>                      | Scarab beetle                               | n.i.a.                           |                 | □               | □               | □               |
| Coleoptera | Scarabaeidae | <i>Podotenus (Podotenus) fulviventris</i>       | Dung beetle                                 | n.i.a.                           |                 |                 |                 | □               |
| Coleoptera | Scarabaeidae | <i>Podotenus (Pseudopodotenus) fulviventris</i> | Dung beetle                                 | n.i.a.                           |                 |                 |                 | □               |
| Coleoptera | Scarabaeidae | <i>Ptyophis eiderae</i>                         | Scarab beetle                               | n.i.a.                           |                 | □               | ■               | ■               |
| Coleoptera | Scarabaeidae | <i>Ptyophis paulseni</i>                        | Scarab beetle                               | n.i.a.                           |                 |                 | □               |                 |
| Coleoptera | Scarabaeidae | <i>Scybalophagus rugosus</i>                    | Dung beetle                                 | n.i.a.                           |                 |                 |                 | □               |

table 2 - continued

| Order           | Family       | Species                                                                    | Common name<br>or general<br>classification | Elevation<br>range<br>[m a.s.l.] | PA<br>~26°<br>S | SG<br>~29°<br>S | LC<br>~33°<br>S | NA<br>~38°<br>S |
|-----------------|--------------|----------------------------------------------------------------------------|---------------------------------------------|----------------------------------|-----------------|-----------------|-----------------|-----------------|
| Coleoptera      | Scarabaeidae | <i>Symphodon<br/>anomalus</i>                                              | Scarab beetle                               | n.i.a.                           |                 |                 | □               | □               |
| Coleoptera      | Scarabaeidae | <i>Tesarius caelatus</i>                                                   | Dung beetle                                 | n.i.a.                           |                 |                 | □               | □               |
| Coleoptera      | Scarabaeidae | <i>Tesserodoniella<br/>elguetai</i>                                        | Dung beetle                                 | n.i.a.                           |                 |                 | □               | □               |
| Coleoptera      | Scarabaeidae | <i>Tesserodoniella<br/>meridionalis</i>                                    | Dung beetle                                 | n.i.a.                           |                 |                 |                 | □               |
| Coleoptera      | Scarabaeidae | <i>Tomarus villosus</i>                                                    | Scarab beetle                               | n.i.a.                           |                 | □               |                 |                 |
| <b>BEEES</b>    |              |                                                                            |                                             |                                  |                 |                 |                 |                 |
| Hymenopter<br>a | Colletidae   | <i>Cadeguala<br/>occidentalis</i>                                          | Bee                                         | n.i.a.                           |                 | □               | ■               | ■               |
| Hymenopter<br>a | Colletidae   | <i>Caupolicana<br/>dimidiata</i>                                           | Bee                                         | n.i.a.                           |                 | ■               |                 |                 |
| Hymenopter<br>a | Colletidae   | <i>Caupolicana<br/>fulvicollis</i>                                         | Bee                                         | n.i.a.                           |                 | ■               | ■               |                 |
| Hymenopter<br>a | Colletidae   | <i>Caupolicana gayi</i>                                                    | Bee                                         | n.i.a.                           | ■               | ■               | ■               | ■               |
| Hymenopter<br>a | Colletidae   | <i>Caupolicana<br/>hirsuta</i>                                             | Bee                                         | n.i.a.                           | ■               | ■               | ■               | ■               |
| Hymenopter<br>a | Colletidae   | <i>Caupolicana<br/>quadrifasciata</i>                                      | Bee                                         | n.i.a.                           |                 | ■               | ■               |                 |
| Hymenopter<br>a | Colletidae   | <i>Leioproctus<br/>delahozii</i><br>( <i>Chilicolletes<br/>delahozii</i> ) | Bee                                         | n.i.a.                           |                 |                 | □               |                 |
| Hymenopter<br>a | Colletidae   | <i>Leioproctus<br/>semicyaneus</i>                                         | Bee                                         | n.i.a.                           | ■               | ■               | □               |                 |
| <b>WASPS</b>    |              |                                                                            |                                             |                                  |                 |                 |                 |                 |
| Hymenopter<br>a | Crabronidae  | <i>Sphex latreillei</i>                                                    | wasp                                        | n.i.a.                           | ■               | ■               | ■               | □               |
| Hymenopter<br>a | Crabronidae  | <i>Zyzyx chilensis</i>                                                     | sand wasp                                   | n.i.a.                           | ■               | ■               | ■               |                 |
| Hymenopter<br>a | Crabronidae  | <i>Bicyrtes variegata</i>                                                  | sand wasp                                   | n.i.a.                           |                 |                 | ■               |                 |
| Hymenopter<br>a | Sphecidae    | <i>Bembix brullei</i>                                                      | sand wasp                                   | n.i.a.                           | ■               | ■               | ■               |                 |
| Hymenopter<br>a | Sphecidae    | <i>Microbembex<br/>ciliata</i>                                             | sand wasp                                   | n.i.a.                           |                 |                 | ■               |                 |
| <b>ANTS</b>     |              |                                                                            |                                             |                                  |                 |                 |                 |                 |
| Hymenopter<br>a | Formicidae   | <i>Camponotus<br/>chilensis</i>                                            | 'Hormigones'<br>(large ant)                 | n.i.a.                           | ■               | ■               | ■               | ■               |
| Hymenopter<br>a | Formicidae   | <i>Camponotus<br/>distinguendus</i>                                        | 'Hormigones'<br>(large ant)                 | n.i.a.                           |                 | ■               | ■               | ■               |
| Hymenopter<br>a | Formicidae   | <i>Camponotus<br/>hellmichi</i>                                            | 'Hormigones'<br>(large ant)                 | n.i.a.                           | ■               | ■               | ■               | ■               |
| Hymenopter<br>a | Formicidae   | <i>Camponotus<br/>morusus</i>                                              | 'Hormigones'<br>(large ant)                 | n.i.a.                           | ■               | ■               | ■               | ■               |
| Hymenopter<br>a | Formicidae   | <i>Camponotus<br/>ovaticeps</i>                                            | 'Hormigones'<br>(large ant)                 | n.i.a.                           |                 | ■               | ■               | ■               |
| Hymenopter<br>a | Formicidae   | <i>Camponotus<br/>spinolae</i>                                             | 'Hormigones'<br>(large ant)                 | n.i.a.                           |                 |                 |                 | ■               |
| Hymenopter<br>a | Formicidae   | <i>Heteroponera<br/>carinifrons</i>                                        | Ant                                         | n.i.a.                           |                 |                 |                 | □               |

table 2 - continued

| Order               | Family          | Species                         | Common name<br>or general<br>classification | Elevation<br>range<br>[m a.s.l.] | PA<br>~26°<br>S | SG<br>~29°<br>S | LC<br>~33°<br>S | NA<br>~38°<br>S |
|---------------------|-----------------|---------------------------------|---------------------------------------------|----------------------------------|-----------------|-----------------|-----------------|-----------------|
| Hymenoptera         | Formicidae      | <i>Monomorium bidentatum</i>    | Harvester ant                               | n.i.a.                           |                 |                 |                 | □               |
| Hymenoptera         | Formicidae      | <i>Monomorium chilensis</i>     | Harvester ant                               | n.i.a.                           |                 | ■               | ■               |                 |
| Hymenoptera         | Formicidae      | <i>Monomorium denticulatum</i>  | Harvester ant                               | n.i.a.                           |                 |                 | □               | □               |
| Hymenoptera         | Formicidae      | <i>Monomorium latastei</i>      | Harvester ant                               | n.i.a.                           |                 |                 | ■               | ■               |
| Hymenoptera         | Formicidae      | <i>Pogonomymex angustus</i>     | Harvester ant                               | n.i.a.                           |                 |                 | □               | □               |
| Hymenoptera         | Formicidae      | <i>Pogonomymex bispinosus</i>   | Harvester ant                               | n.i.a.                           |                 |                 | □               |                 |
| Hymenoptera         | Formicidae      | <i>Pogonomymex laevigatus</i>   | Harvester ant                               | n.i.a.                           |                 |                 |                 | □               |
| Hymenoptera         | Formicidae      | <i>Pogonomymex odoratus</i>     | Harvester ant                               | n.i.a.                           |                 |                 |                 | ■               |
| Hymenoptera         | Formicidae      | <i>Pogonomymex vermiculatus</i> | Harvester ant                               | n.i.a.                           | □               | □               | □               | □               |
| Hymenoptera         | Formicidae      | <i>Solenopsis dysderces</i>     | Fire ant                                    | n.i.a.                           |                 |                 | ■               |                 |
| Hymenoptera         | Formicidae      | <i>Solenopsis gayi</i>          | Fire ant                                    | n.i.a.                           |                 | □               | □               | □               |
| Hymenoptera         | Formicidae      | <i>Solenopsis helena</i>        | Fire ant                                    | n.i.a.                           |                 |                 | ■               | ■               |
| Hymenoptera         | Formicidae      | <i>Solenopsis latastei</i>      | Fire ant                                    | n.i.a.                           | ■               | ■               | ■               | ■               |
| <b>TERMITES</b>     |                 |                                 |                                             |                                  |                 |                 |                 |                 |
| Isoptera            | Rhinotermitidae | <i>Reticulitermes flavipes</i>  | Kollar (Termite)                            | n.i.a.                           |                 |                 | □               |                 |
| <b>NEUROPTERANS</b> |                 |                                 |                                             |                                  |                 |                 |                 |                 |
| Neuroptera          | Myrmeleontidae  | <i>Elicura litigator</i>        | (antlion; net-winged insect)                | n.i.a.                           |                 |                 | □               |                 |
| <b>HEMIPTERANS</b>  |                 |                                 |                                             |                                  |                 |                 |                 |                 |
| Hemiptera           | Cicadidae       | <i>Tettigades chilensis</i>     | Chicharra grande común (cicada)             | n.i.a.                           | ■               | ■               | ■               | □               |

Table S3: Properties of study sites. Slope, Physical erosion rate, Denudation rate are values from mid-slope measurements. Elevation is deducted from a south-facing midslope position; \* = unexpected finding, discussed in original paper; bulk densities are weighted means of the measured intervals to a depth of 40 cm, they are potentially overestimated as they are not corrected for amount of coarse fragments (>2mm); bulk density and angles of midslopes are approximations for PA, as several closeby slopes were used; Abbreviations: PA= Pan de Azúcar, SG = Santa Gracia, LC = La Campana, NA= Nahuelbuta, N = north-facing, S = south-facing, MAT = Mean annual temperature, MAP = Mean annual precipitation; References: <sup>1</sup>Bernhard et al. (2018), <sup>2</sup>van Dongen et al. (2019), <sup>3</sup>Fick and Hijmans (2017), <sup>4</sup>Oeser et al. (2018), <sup>5</sup>Schaller et al. (2018)

| Site name                                                                           | Pan de Azúcar       |                    | Santa Gracia        |                    | La Campana          |                     | Nahuelbuta          |                     |
|-------------------------------------------------------------------------------------|---------------------|--------------------|---------------------|--------------------|---------------------|---------------------|---------------------|---------------------|
| <b>Climate type</b>                                                                 | arid                |                    | semi-arid           |                    | mediterranean       |                     | humid               |                     |
| <b>Elevation</b><br>[m a.s.l.] <sup>4</sup>                                         | 330                 |                    | 682                 |                    | 730                 |                     | 1,239               |                     |
| <b>Vegetation cover</b><br>[%] <sup>4</sup>                                         | <10                 |                    | 30-40               |                    | near 100            |                     | 100                 |                     |
| <b>MAT</b><br>[°C] <sup>3</sup>                                                     | 16.8                |                    | 13.7                |                    | 14.1                |                     | 6.6                 |                     |
| <b>MAP</b><br>[mm] <sup>3</sup>                                                     | 12                  |                    | 66                  |                    | 367                 |                     | 1,469               |                     |
| <b>Denudation rate</b><br>$\pm 2\sigma$ [mm kyr <sup>-1</sup> ] <sup>2</sup>        | 7.66<br>$\pm 0.69$  |                    | 9.21<br>$\pm 0.84$  |                    | 200*<br>$\pm 22$    |                     | 27.4<br>$\pm 2.4$   |                     |
| <b>Aspect</b><br>Slope [°] <sup>4</sup>                                             | S                   | N                  | S                   | N                  | S                   | N                   | S                   | N                   |
|                                                                                     | 40                  | 25                 | 25                  | 15                 | 23                  | 12                  | 15                  | 13                  |
| <b>Physical erosion rate</b><br>[t km <sup>-2</sup> yr <sup>-1</sup> ] <sup>4</sup> | 10.06<br>$\pm 0.68$ | 9.13<br>$\pm 0.49$ | 10.49<br>$\pm 7.73$ | 8.71<br>$\pm 4.75$ | 33.77<br>$\pm 4.60$ | 23.36<br>$\pm 9.22$ | 39.98<br>$\pm 4.33$ | 14.22<br>$\pm 1.39$ |
| <b>Denudation rate</b><br>[cm kyr <sup>-1</sup> ] <sup>5</sup>                      | 0.58<br>$\pm 0.03$  | 0.46<br>$\pm 0.02$ | 1.63<br>$\pm 0.09$  | 1.05<br>$\pm 0.05$ | 4.25<br>$\pm 0.23$  | 5.65<br>$\pm 0.30$  | 3.22<br>$\pm 0.13$  | n.d.                |
| <b>Bulk density</b><br>[Mg m <sup>-3</sup> ] <sup>1</sup>                           | 1.5                 | 1.3                | 1.5                 | 1.5                | 1.1                 | 1.5                 | 0.8                 | 0.9                 |

Table S4: Parameters of sampled plots (geographic location, mobile layer depth, general description of surface); 'none' plots were treated as 'bottom' plots; GPS data in WGS 84 projection; PA plots with multiple use had partly destroyed ground surfaces from sampling in previous years (especially north-facing top), loose material started to form new hardened top layer, Abbreviations: PA= Pan de Azúcar, SG = Santa Gracia, LC = La Campana, NA= Nahuelbuta, N = north-facing, S = south-facing; References: <sup>1</sup>Luebert and Pliscoff (2006), <sup>2</sup>Oeser (2018)

| Site name | Vegetation type <sup>1</sup>                                                                           | Dominant plant species <sup>2</sup>                                                                                                                                                                                                                                                                                                                                                                                                                                                                                                                                                                                                                                                                                                                         | Aspect | Position on slope | GPS lat     | GPS long    | Year of data acquisition | Plot surface description (2018)                                                                                                                                                                                                                                         |
|-----------|--------------------------------------------------------------------------------------------------------|-------------------------------------------------------------------------------------------------------------------------------------------------------------------------------------------------------------------------------------------------------------------------------------------------------------------------------------------------------------------------------------------------------------------------------------------------------------------------------------------------------------------------------------------------------------------------------------------------------------------------------------------------------------------------------------------------------------------------------------------------------------|--------|-------------------|-------------|-------------|--------------------------|-------------------------------------------------------------------------------------------------------------------------------------------------------------------------------------------------------------------------------------------------------------------------|
| PA        | Mediterranean coastal desert scrub of <i>Euphorbia lactiflora</i> and <i>Eulychnia saint-pieana</i>    | more abundant vegetation in small ravines; S-facing slope: <i>Tetragonia maritima</i> , <i>Nolana mollis</i> , <i>Perilyte</i> sp., <i>Stipa plumosa</i> ; N-facing slope: <i>Nolana mollis</i> and <i>Cristaria integerrima</i>                                                                                                                                                                                                                                                                                                                                                                                                                                                                                                                            | S      | "none"            | -26.109444° | -70.550833° | 2016 / 2017 / 2018       | bare ground                                                                                                                                                                                                                                                             |
|           |                                                                                                        |                                                                                                                                                                                                                                                                                                                                                                                                                                                                                                                                                                                                                                                                                                                                                             |        | bottom            | -26.110556° | -70.548611° | 2017                     | bare ground                                                                                                                                                                                                                                                             |
|           |                                                                                                        |                                                                                                                                                                                                                                                                                                                                                                                                                                                                                                                                                                                                                                                                                                                                                             | N      | top               | -26.110000° | -70.550000° | 2016 / 2017 / 2018       | bare ground                                                                                                                                                                                                                                                             |
|           |                                                                                                        |                                                                                                                                                                                                                                                                                                                                                                                                                                                                                                                                                                                                                                                                                                                                                             |        | top 2 (NW) "none" | -26.110000° | -70.550556° | 2018                     | bare ground                                                                                                                                                                                                                                                             |
|           |                                                                                                        |                                                                                                                                                                                                                                                                                                                                                                                                                                                                                                                                                                                                                                                                                                                                                             |        | bottom            | -26.109722° | -70.550556° | 2016 / 2018              | bare ground                                                                                                                                                                                                                                                             |
| bottom 2  | -26.110556°                                                                                            | -70.548611°                                                                                                                                                                                                                                                                                                                                                                                                                                                                                                                                                                                                                                                                                                                                                 | 2017   | bare ground       |             |             |                          |                                                                                                                                                                                                                                                                         |
| SG        | Interior Mediterranean desert scrub of <i>Heliotropum stenophyllum</i> and <i>Flourensia thurifera</i> | original vegetation disturbed, current shrubby vegetation influenced by livestock grazing (mostly goats; Bahre, 1979), area: <i>Balbisia pedunculata</i> , <i>Baccharis paniculata</i> , <i>Bulnesia chilensis</i> ; S-facing slope: <i>Proustia cuneifolia</i> , <i>Senna cumingii</i> ; N-facing slope: <i>Cordia decandra</i> and <i>Adesmia</i> sp., <i>Cumulopuntia sphaerica</i> , <i>Eulychnia acida</i>                                                                                                                                                                                                                                                                                                                                             | S      | top               | -29.757222° | -71.165556° | 2016 / 2017 / 2018       | 7% bushes, 2% leave litter, 4% boulders & stones                                                                                                                                                                                                                        |
|           |                                                                                                        |                                                                                                                                                                                                                                                                                                                                                                                                                                                                                                                                                                                                                                                                                                                                                             |        | bottom            | -29.758056° | -71.165278° | 2016 / 2017 / 2018       | cover: 6 m <sup>2</sup> bushes, 5 m <sup>2</sup> ground covering cacti; 5 m <sup>2</sup> boulders & stones; 4 m <sup>2</sup> thorny litter                                                                                                                              |
|           |                                                                                                        |                                                                                                                                                                                                                                                                                                                                                                                                                                                                                                                                                                                                                                                                                                                                                             | N      | top               | -29.762222° | -71.164722° | 2016 / 2017 / 2018       | 8 m <sup>2</sup> bushes, 4 m <sup>2</sup> boulders & stones; 8 m <sup>2</sup> cacti                                                                                                                                                                                     |
|           |                                                                                                        |                                                                                                                                                                                                                                                                                                                                                                                                                                                                                                                                                                                                                                                                                                                                                             |        | bottom            | -29.761111° | -71.164722° | 2016 / 2017 / 2018       | 6 m <sup>2</sup> cacti covering the ground + leave litter; 9 m <sup>2</sup> bushes; 5 m <sup>2</sup> cacti; 5 m <sup>2</sup> boulders & stones                                                                                                                          |
| LC        | Coastal mediterranean sclerophyllous forest of <i>Lithraea caustica</i> and <i>Cryptocaria alba</i>    | area: <i>L. caustica</i> , <i>C. alba</i> , <i>Quillaja saponaria</i> , <i>Kageneckia oblonga</i> ; <i>Colliguaja odorifera</i> , <i>Aristeguiella salvia</i> , <i>Retanilla trinervia</i> , <i>Podanthus mitiqui</i> , <i>Geranium robertianum</i> , <i>Stellaria media</i> , <i>Adiantum chilense</i> ; S-facing slope: <i>L. caustica</i> , <i>C. odorifera</i> , <i>P. mitiqui</i> , <i>A. salvia</i> , <i>Alstroemeria</i> sp., <i>G. robertianum</i> , <i>S. media</i> , <i>Solenomelus pedunculatus</i> , <i>A. chilense</i> . N-facing slope: <i>L. caustica</i> , <i>Jubaea chilensis</i> , <i>R. trinervia</i> , <i>A. salvia</i> , <i>C. odorifera</i> , <i>Poa</i> spp., <i>Sonchus oleraceus</i> , <i>Tropaeolum</i> sp., <i>Dioscorea</i> sp. | S      | top               | -32.955833° | -71.063889° | 2016 / 2017 / 2018       | 2 cm litter with relatively large leaves, some traces of rodent faeces, about 15% of ground covered with dead wood                                                                                                                                                      |
|           |                                                                                                        |                                                                                                                                                                                                                                                                                                                                                                                                                                                                                                                                                                                                                                                                                                                                                             |        | bottom            | -32.956111° | -71.064167° | 2016 / 2017 / 2018       | 2-3 cm litter, conspicuously many spider webs at hole entrances, 30% surface with little slope, 5% stones, 5% dead wood; many holes under stones (often 20 cm width); rodent faeces, rodent runways, often loose litter rearranged by surface running water during rain |
|           |                                                                                                        |                                                                                                                                                                                                                                                                                                                                                                                                                                                                                                                                                                                                                                                                                                                                                             | N      | top               | -32.957500° | -71.064444° | 2016 / 2017 / 2018       | seemingly rodent activity (lots of faeces, runways), traces of fire, hardly any insect holes, 0-2 cm litter; 50% shrubcover                                                                                                                                             |
|           |                                                                                                        |                                                                                                                                                                                                                                                                                                                                                                                                                                                                                                                                                                                                                                                                                                                                                             |        | bottom            | -32.956667° | -71.063889° | 2016 / 2017 / 2018       | plot covered with approx. 50% with signs of trampling by i.e. cows; 20% shrubcover; 1-2 cm litter                                                                                                                                                                       |
| NA        | Coastal temperate forest of <i>Araucaria araucana</i>                                                  | area: <i>Nothofagus dombeyi</i> , <i>A. araucana</i> , <i>Nothofagus obliqua</i> , <i>Nothofagus antarctica</i> , <i>Gaultheria mucronata</i> , <i>Azara microphylla</i> , <i>Baccharis</i> sp., <i>Ribes magellanicum</i> , <i>Berberis montana</i> , <i>Stipa</i> sp., <i>Mutisia decurrens</i> , <i>Chusquea culeou</i> , <i>Bromus</i> sp., <i>Viola maculata</i> , <i>Adenocaulon chilense</i> ; N-facing slope: <i>N. obliqua</i> , <i>N. antarctica</i> , <i>G. mucronata</i> , <i>Stipa</i> sp.; S-facing slope: <i>A. araucana</i> , <i>N. antarctica</i> , <i>C. culeou</i> , <i>Usnea</i> sp.                                                                                                                                                    | S      | top               | -37.807778° | -73.013056° | 2016 / 2017 / 2018       | 2 cm of litter, no understory under bamboo ( <i>Chusquea</i> sp.) shrubs; edge of plot; traces of running water on surface                                                                                                                                              |
|           |                                                                                                        |                                                                                                                                                                                                                                                                                                                                                                                                                                                                                                                                                                                                                                                                                                                                                             |        | bottom            | -37.808611° | -73.013333° | 2016 / 2017 / 2018       | more understory here than at top slope position; most holes look very similar, more litter than at top slope position                                                                                                                                                   |
|           |                                                                                                        |                                                                                                                                                                                                                                                                                                                                                                                                                                                                                                                                                                                                                                                                                                                                                             | N      | top               | -37.809444° | -73.013889° | 2016 / 2017 / 2018       | surface covered with dry grass and leaf litter, hardly any difference to understory at N bottom; under grass: rodents, lizards; more grass than at N bottom                                                                                                             |
|           |                                                                                                        |                                                                                                                                                                                                                                                                                                                                                                                                                                                                                                                                                                                                                                                                                                                                                             |        | bottom            | -37.808611° | -73.013889° | 2016 / 2017 / 2018       | surface covered with 2 cm litter and grass, many ants present, runways of rodents under grass                                                                                                                                                                           |
